# Supplementary material for: Sustainable keratin recovery process using a bio-based ionic liquid aqueous solution and its techno-economic assessment
Source: Royal Society of Chemistry journal article supplement (doi:10.1039/d3gc00850a), 2023-01-01
Supplement: d3gc00850a1.pdf [file d3gc00850a1.pdf]

# Electronic Supplementary Information

## **Sustainable keratin recovery process using a bio-based ionic liquid aqueous solution and its techno-economic assessment**

Cariny Polesca <sup>a,b</sup>, Amir Al Ghatta <sup>b</sup>, Helena Passos <sup>a</sup>, João A. P. Coutinho <sup>a</sup>,  
Jason P. Hallett <sup>b\*</sup>, and Mara G. Freire <sup>a\*</sup>

<sup>a</sup> CICECO - Aveiro Institute of Materials, Department of Chemistry, University of Aveiro, 3810-193 Aveiro, Portugal

<sup>b</sup> Department of Chemical Engineering, Imperial College London, South Kensington Campus, London SW7 2AZ, U.K

\* Corresponding author:

maragfreire@ua.pt and j.hallett@imperial.ac.uk

**Table S1.** Parameters used to estimate the contribution of a refrigeration system.

| Parameters                                                                                     | Value |
|------------------------------------------------------------------------------------------------|-------|
| Electricity ( $\text{kW}_{\text{electricity}} \cdot \text{MJ}_{\text{refrigerant}}^{-1}$ )     | 0.074 |
| Cooling water ( $\text{MJ} \cdot \text{MJ}_{\text{refrigerant}}^{-1}$ )                        | 0.74  |
| CO <sub>2</sub> emissions due to electricity generation ( $\text{kg} \cdot \text{kWh}^{-1}$ )  | 0.45  |
| Capital cost per unit of refrigerant ( $\text{\$} \cdot \text{MJ}_{\text{refrigerant}}^{-1}$ ) | 3.10  |

**Table S2.** Values used to estimate the utility cost of the keratin recovery process.

| Parameters                                             | Value |
|--------------------------------------------------------|-------|
| Fuel ( $\text{\$} \cdot \text{MJ}^{-1}$ )              | 2.74  |
| Steam ( $\text{\$} \cdot \text{kg}^{-1}$ )             | 0.12  |
| Cooling water ( $\text{\$} \cdot \text{m}^{-3}$ )      | 0.055 |
| Electricity ( $\text{\$} \cdot \text{kWh}^{-1}$ )      | 0.3   |
| Chicken feathers ( $\text{\$} \cdot \text{ton}^{-1}$ ) | 20    |

**Table S3.** Parameters used to estimate the total capital cost.

| Parameters               | Abbreviation | Equation                                                        |
|--------------------------|--------------|-----------------------------------------------------------------|
| Direct field cost        | DF           | Sum of the installed costs (estimated through Aspen)            |
| Direct field labour cost | DFLC         | $0.25 \times \text{DF}$                                         |
| Indirect field cost      | IFC          | $1.15 \times \text{DFLC}$                                       |
| Total field cost         | TFC          | $\text{DF} + \text{DFLC} + \text{IFC}$                          |
| Home office cost         | HOC          | $0.3 \times \text{DF}$                                          |
| Other project cost       | OPC          | $0.03 \times \text{DF} + 0.15 \times (\text{TFC} + \text{HOC})$ |
| Total project cost       | TPC          | $\text{TFC} + \text{HOC} + \text{OPC}$                          |

**Table S4.** Parameters used to estimate the fixed cost.

| <b>Parameters</b> | <b>Equation</b>                     |
|-------------------|-------------------------------------|
| Maintenance (M)   | $0.1 \times \text{TFC}$             |
| Laboratory        | $0.2 \times \text{LC}$              |
| Supervision       | $0.2 \times (\text{LC} + \text{M})$ |
| Plant overhead    | $0.5 \times (\text{LC} + \text{M})$ |
| Depreciation      | $0.1 \times \text{TFC}$             |
| Insurance         | $0.01 \times \text{TFC}$            |
| Local taxes       | $0.02 \times \text{TFC}$            |
| Royalties         | $0.01 \times \text{TFC}$            |

**Table S5.** Results of RSM for keratin recovery from chicken feathers using an aqueous solution of  $[N_{111}(2OH)][C_1CO_2]$ .

| Assay | Coded values   |                |                | Response  |
|-------|----------------|----------------|----------------|-----------|
|       | X <sub>1</sub> | X <sub>2</sub> | X <sub>3</sub> | Yield (%) |
| 1     | -1             | -1             | -1             | 50.14     |
| 2     | 1              | -1             | -1             | 28.87     |
| 3     | -1             | 1              | -1             | 55.89     |
| 4     | 1              | 1              | -1             | 64.51     |
| 5     | -1             | -1             | 1              | 80.01     |
| 6     | 1              | -1             | 1              | 15.31     |
| 7     | -1             | 1              | 1              | 90.84     |
| 8     | 1              | 1              | 1              | 24.98     |
| 9     | -1.68          | 0              | 0              | 64.06     |
| 10    | 1.68           | 0              | 0              | 67.99     |
| 11    | 0              | -1.68          | 0              | 78.30     |
| 12    | 0              | 1.68           | 0              | 86.79     |
| 13    | 0              | 0              | -1.68          | 43.23     |
| 14    | 0              | 0              | 1.68           | 93.57     |
| 15    | 0              | 0              | 0              | 80.15     |
| 16    | 0              | 0              | 0              | 83.17     |
| 17    | 0              | 0              | 0              | 82.15     |

**Table S6.** Estimated coefficients obtained from the polynomial model and statistical criteria of keratin recovery from chicken feathers.

| Parameters                                       | Coefficients | Standard deviation | t-student (4) | P-value | Confidence Limit -90 % | Confidence Limit +90 % |
|--------------------------------------------------|--------------|--------------------|---------------|---------|------------------------|------------------------|
| Interception                                     | 86.6615      | 2.6965             | 32.1388       | 0.0000  | 80.9130                | 92.4100                |
| Ethanol concentration (L) <sup>1</sup>           | -10.0117     | 1.6344             | -6.1258       | 0.0036  | -13.4959               | -6.5275                |
| Ethanol concentration (Q) <sup>1</sup>           | -11.3390     | 1.6366             | -6.9286       | 0.0022  | -14.8279               | -7.8501                |
| Time (L) <sup>2</sup>                            | 5.5811       | 1.6344             | 3.4149        | 0.0269  | 2.0969                 | 9.0653                 |
| Time (Q) <sup>2</sup>                            | -5.4858      | 1.6366             | -3.3521       | 0.0285  | -8.9747                | -1.9970                |
| Solution:coagulant ratio (L) <sup>3</sup>        | 7.0577       | 1.6344             | 4.3184        | 0.0124  | 3.5735                 | 10.5419                |
| Solution:coagulant ratio (Q)                     | -10.4975     | 1.6366             | -6.4144       | 0.0030  | -13.9864               | -7.0086                |
| Ethanol concentration x solution:coagulant ratio | -14.7388     | 2.1344             | -6.9052       | 0.0023  | -19.2891               | -10.1884               |

**Table S7.** ANOVA data for keratin recovery from chicken feathers using bio-based IL obtained from RSM.

| Factors                                   | Sum of squares | Degree of freedom | Mean Square | F-value | P-value |
|-------------------------------------------|----------------|-------------------|-------------|---------|---------|
| Ethanol concentration (L) <sup>1</sup>    | 1367.67        | 1                 | 1367.67     | 37.5252 | 0.0036  |
| Ethanol concentration (Q) <sup>1</sup>    | 1749.64        | 1                 | 1749.64     | 48.0053 | 0.0022  |
| Time (L) <sup>2</sup>                     | 425.02         | 1                 | 425.02      | 11.6614 | 0.0269  |
| Time (Q) <sup>2</sup>                     | 409.53         | 1                 | 409.53      | 11.2363 | 0.0285  |
| Solution:coagulant ratio (L) <sup>3</sup> | 679.67         | 1                 | 679.67      | 18.6482 | 0.0124  |
| Solution:coagulant ratio (Q) <sup>3</sup> | 1499.59        | 1                 | 1499.59     | 41.1446 | 0.0030  |
| Solid-liquid ratio x concentration        | 1737.85        | 1                 | 1737.85     | 47.6817 | 0.0023  |
| Lack or Fit                               | 3469.42        | 7                 | 495.63      | 13.5987 | 0.0119  |
| Pure Error                                | 145.79         | 4                 | 36.45       | -       | -       |

**Table S8.** Technoeconomic results from the process simulation.

| Parameters                        | Abbreviation | Value                                                       |
|-----------------------------------|--------------|-------------------------------------------------------------|
| Direct field cost                 | DF           | 3.5 m\$                                                     |
| Total field cost                  | TFC          | 5.4 m\$                                                     |
| Total project cost                | TPC          | 7.5 m\$                                                     |
| Total annual fixed cost           | -            | 4.5 m\$·year <sup>-1</sup>                                  |
| Total annual variable cost        | -            | 2.2 m\$·year <sup>-1</sup>                                  |
| Minimum selling price for keratin | -            | 22 \$·kg <sup>-1</sup>                                      |
| CO <sub>2</sub> emissions         | -            | 4.04 kg <sub>CO2</sub> ·kg <sub>keratin</sub> <sup>-1</sup> |

**Eq. S1.** Yield (%) = 86.66 – 10.01( $X_1$ ) – 11.33( $X_1^2$ ) + 5.88( $X_2$ ) – 5.48( $X_2^2$ ) + 7.05( $X_3$ ) – 10.50( $X_3^2$ ) – 14.73( $X_1 \times X_3$ )

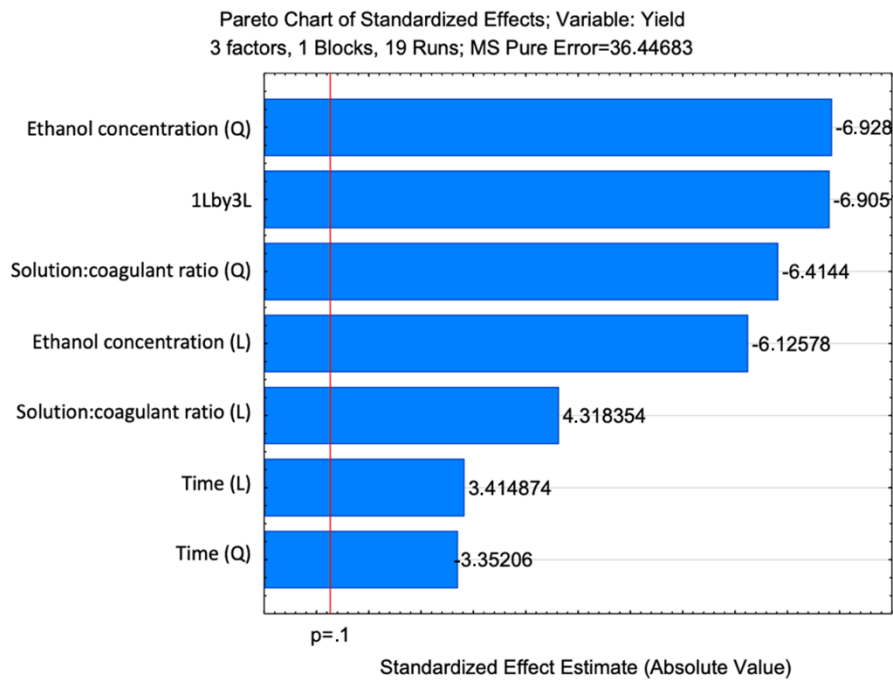

**Fig. S1.** Pareto diagram for the effects of process parameters on keratin recovery from chicken feathers.

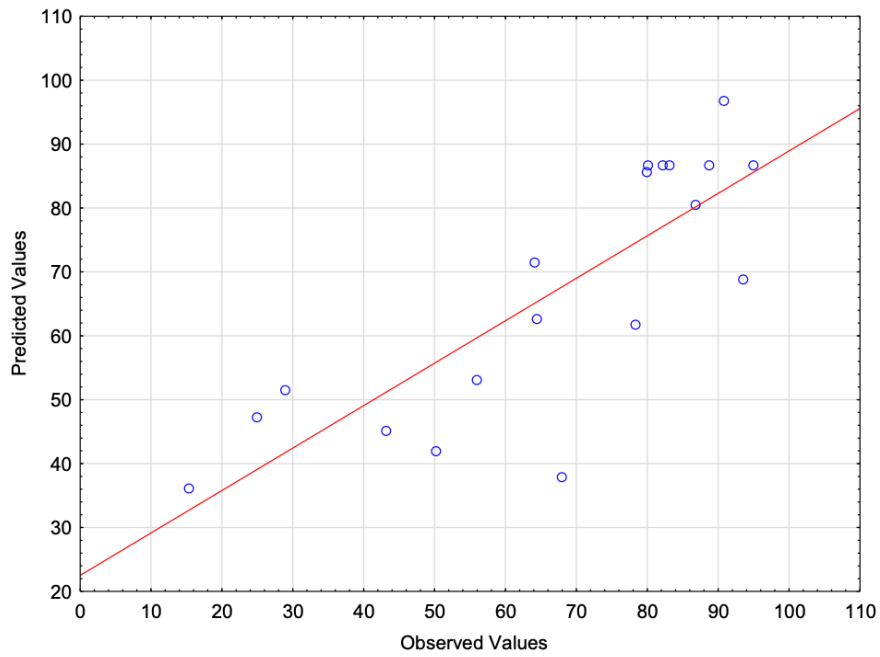

**Fig. S2.** Predicted and observed values obtained from RSM design.

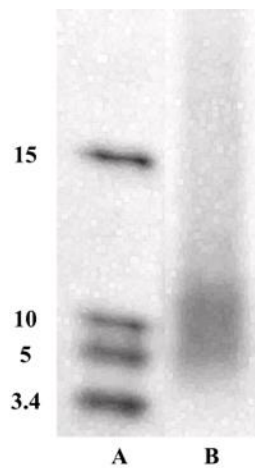

**Fig. S3.** SDS-PAGE of protein marker (A) and keratin recovered using the optimal conditions (20.25 wt % of ethanol concentration, 5 h, and solution:coagulant ratio of 1:1.45).

### Cholinium acetate fresh:

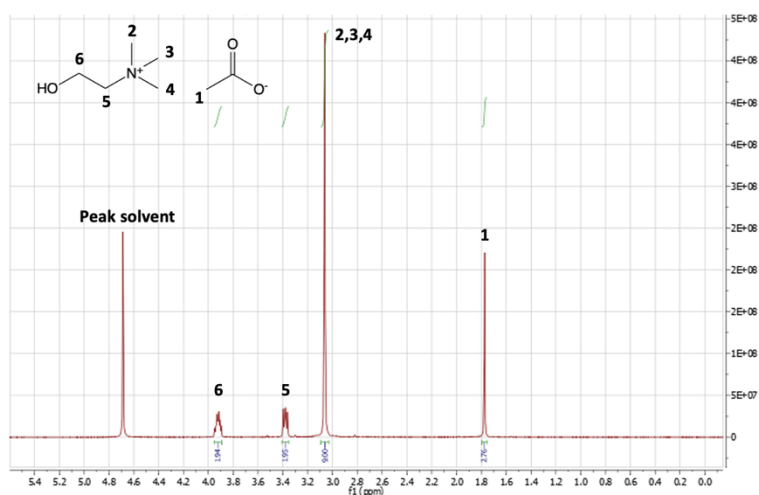

**Fig. S4.** <sup>1</sup>H NMR (D<sub>2</sub>O, 300 MHz, [ppm]): 3.922 (2H, m); 3.379 (2H, t, J= 10.2 Hz); 3.062 (3H, s); 1.774 (3H, s).

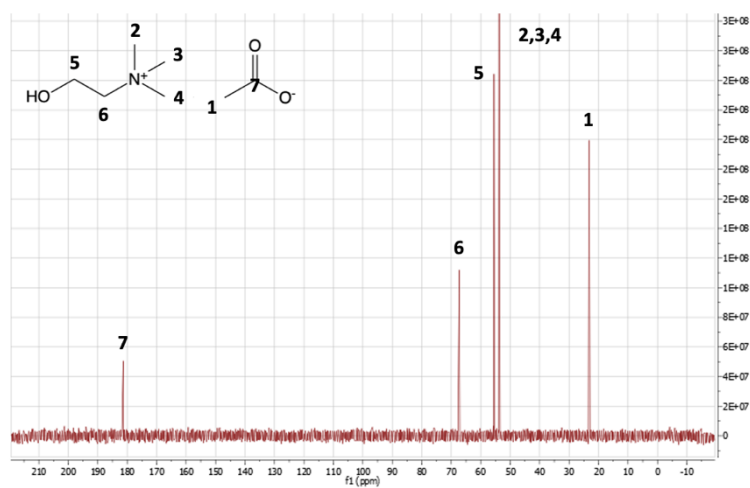

**Fig. S5.** <sup>13</sup>C NMR (D<sub>2</sub>O, 75.47 MHz, [ppm]): 181.556; 67.563; 55.499; 53.811; 23.065.



## Cholinium acetate recovered:

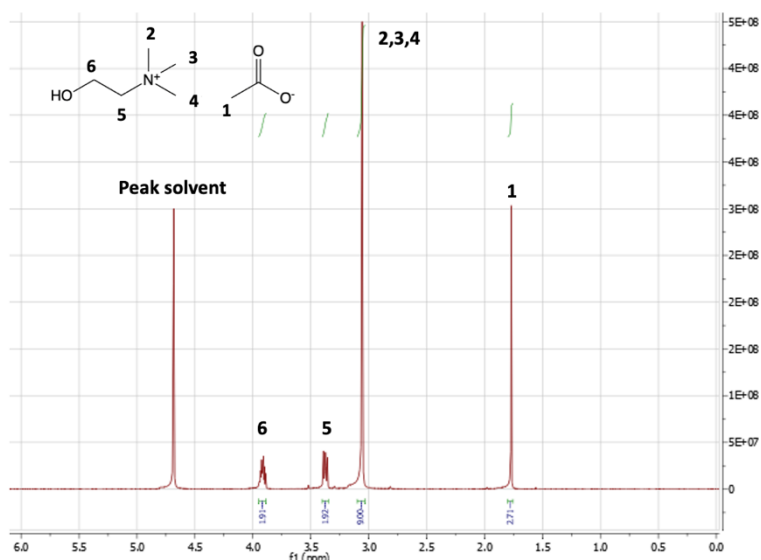

**Fig. S6.** <sup>1</sup>H NMR (D<sub>2</sub>O, 300 MHz, [ppm]): 3.908 (2H, m); 3.373 (2H, t, J= 9.9 Hz); 3.057 (3H, s); 1.769 (3H, s).

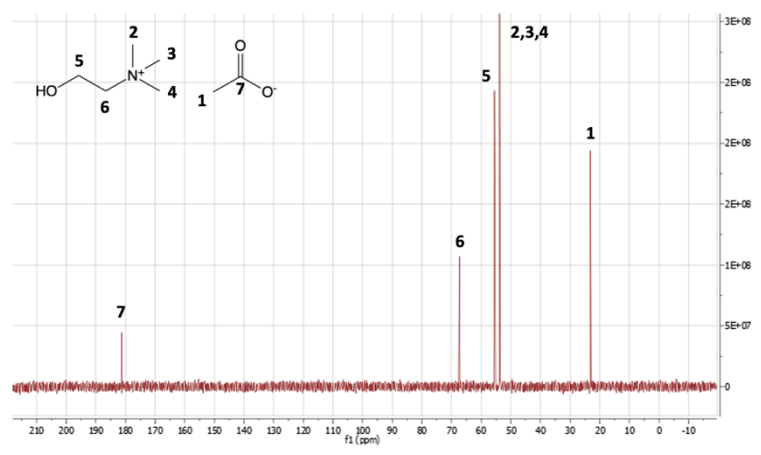

**Fig. S7.** <sup>13</sup>C NMR (D<sub>2</sub>O, 75.47 MHz, [ppm]): 181.185; 67.271; 55.496; 53.806; 23.089.

## References

- [1] A. Al-Ghatta, J. D. E. T. Wilton-Ely and J. P. Hallett, From sugars to FDCA: a techno-economic assessment using a design concept based on solvent selection and carbon dioxide emissions, *Green Chemistry*, 2021, 23, 1716–1733.
- [2] A. R. Abouelela, A. Al-Ghatta, P. Verdía, M. Shan Koo, J. Lemus and J. P. Hallett, Evaluating the Role of Water as a Cosolvent and an Antisolvent in [HSO<sub>4</sub>]-Based Protic Ionic Liquid Pretreatment, *ACS Sustainable Chemistry & Engineering*, 2021, 9, 10524–10536.
